# Supplementary material for: Cdk1 phosphorylation of fission yeast paxillin inhibits its cytokinetic ring localization
Source: PubMed Central journal article supplement — Mol Biol Cell. 2021 Aug 15;32(17):1534–44. doi: 10.1091/mbc.E20-12-0807 (PMC8351747; doi:10.1091/mbc.e20-12-0807), 2021-08-15
Supplement: mbc-32-1534-s001.pdf [file mbc-32-1534-s001.pdf]

# Supplemental Materials

Molecular Biology of the Cell

Mangione *et al.*

A

| Px11 [S/T]P site | Spectral count from GFP-Px11 purification | Identified in these supplemental references |
|------------------|-------------------------------------------|---------------------------------------------|
| S3               | Not detected                              | 2, 4, 5                                     |
| S24              | 6                                         | 2, 5                                        |
| S31              | 15                                        | 2, 5                                        |
| T55              | 12                                        | 2, 5                                        |
| T64              | 33                                        | 2, 5                                        |
| S67              | 142                                       | 1, 2, 5                                     |
| S97              | 7                                         | 1, 2, 3, 5                                  |
| S136             | 8                                         | n.a.                                        |
| T214             | Not detected                              | n.a.                                        |

B

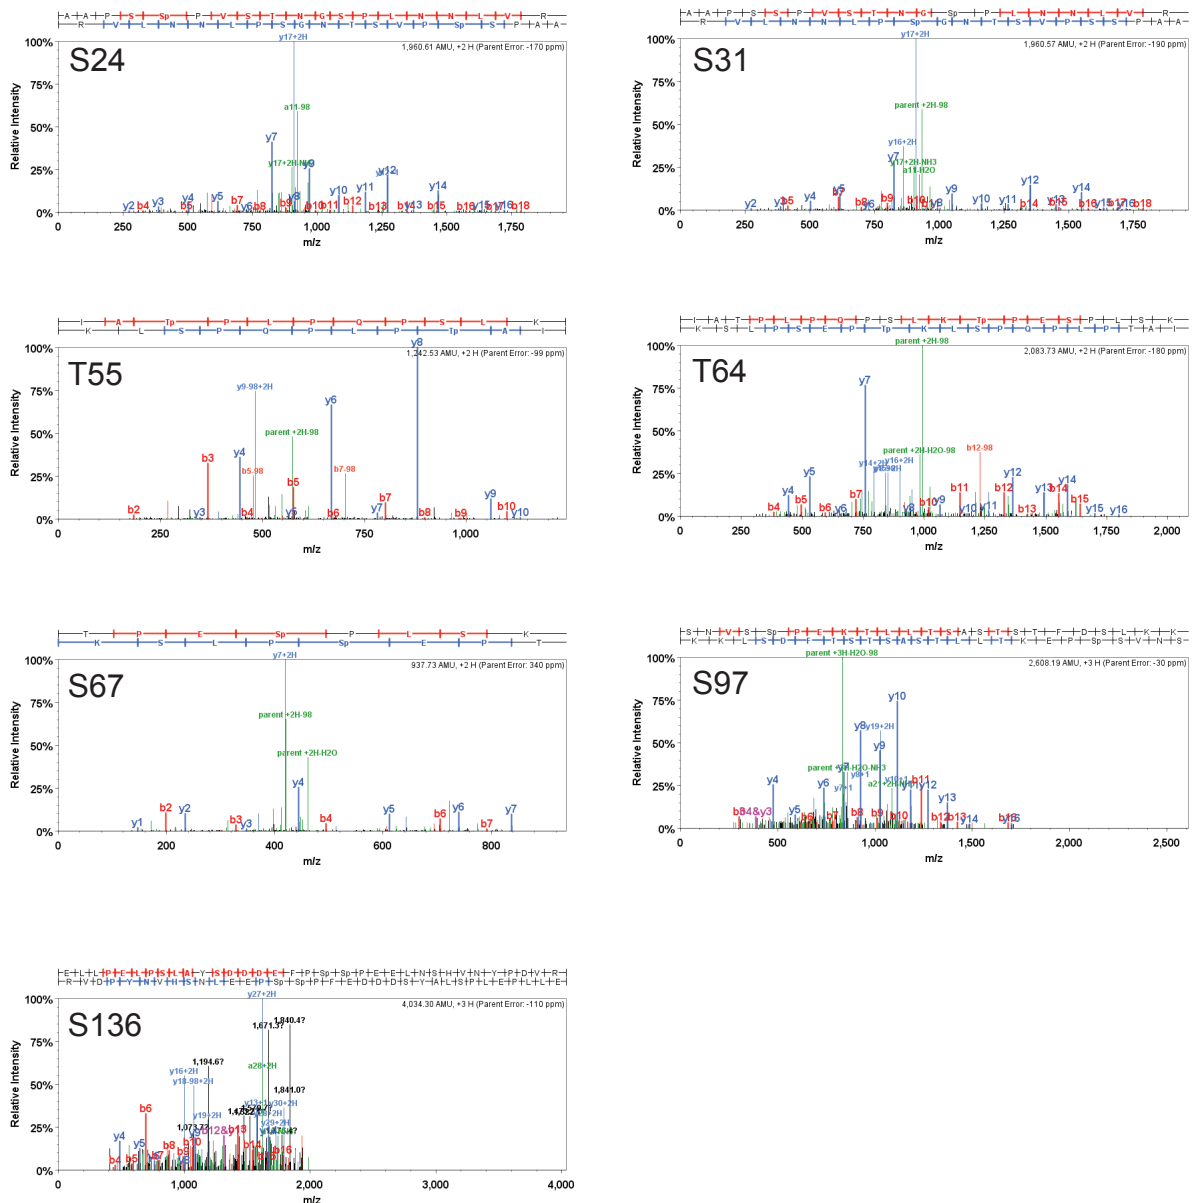

Figure S1

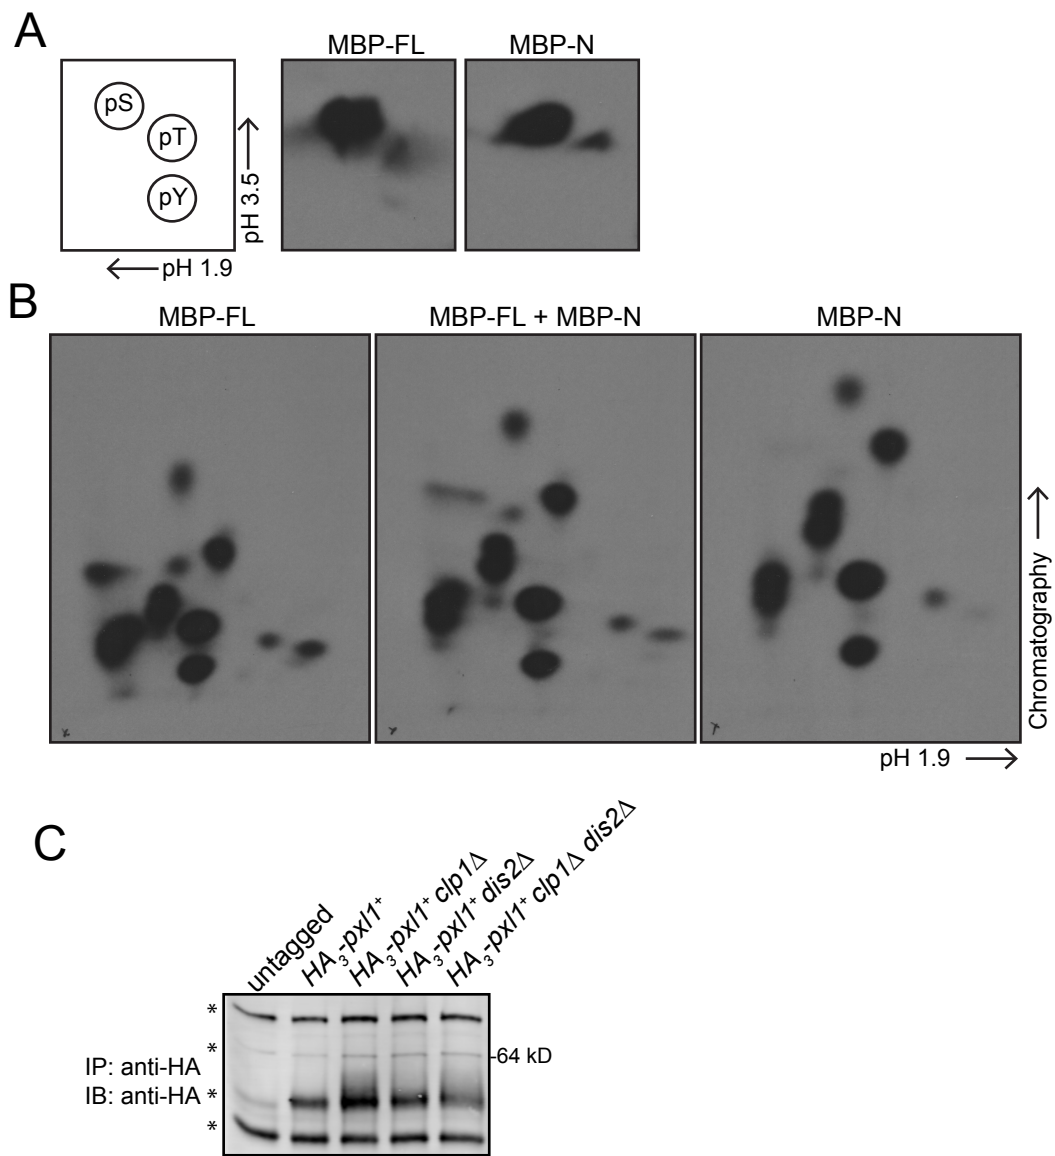

Figure S2

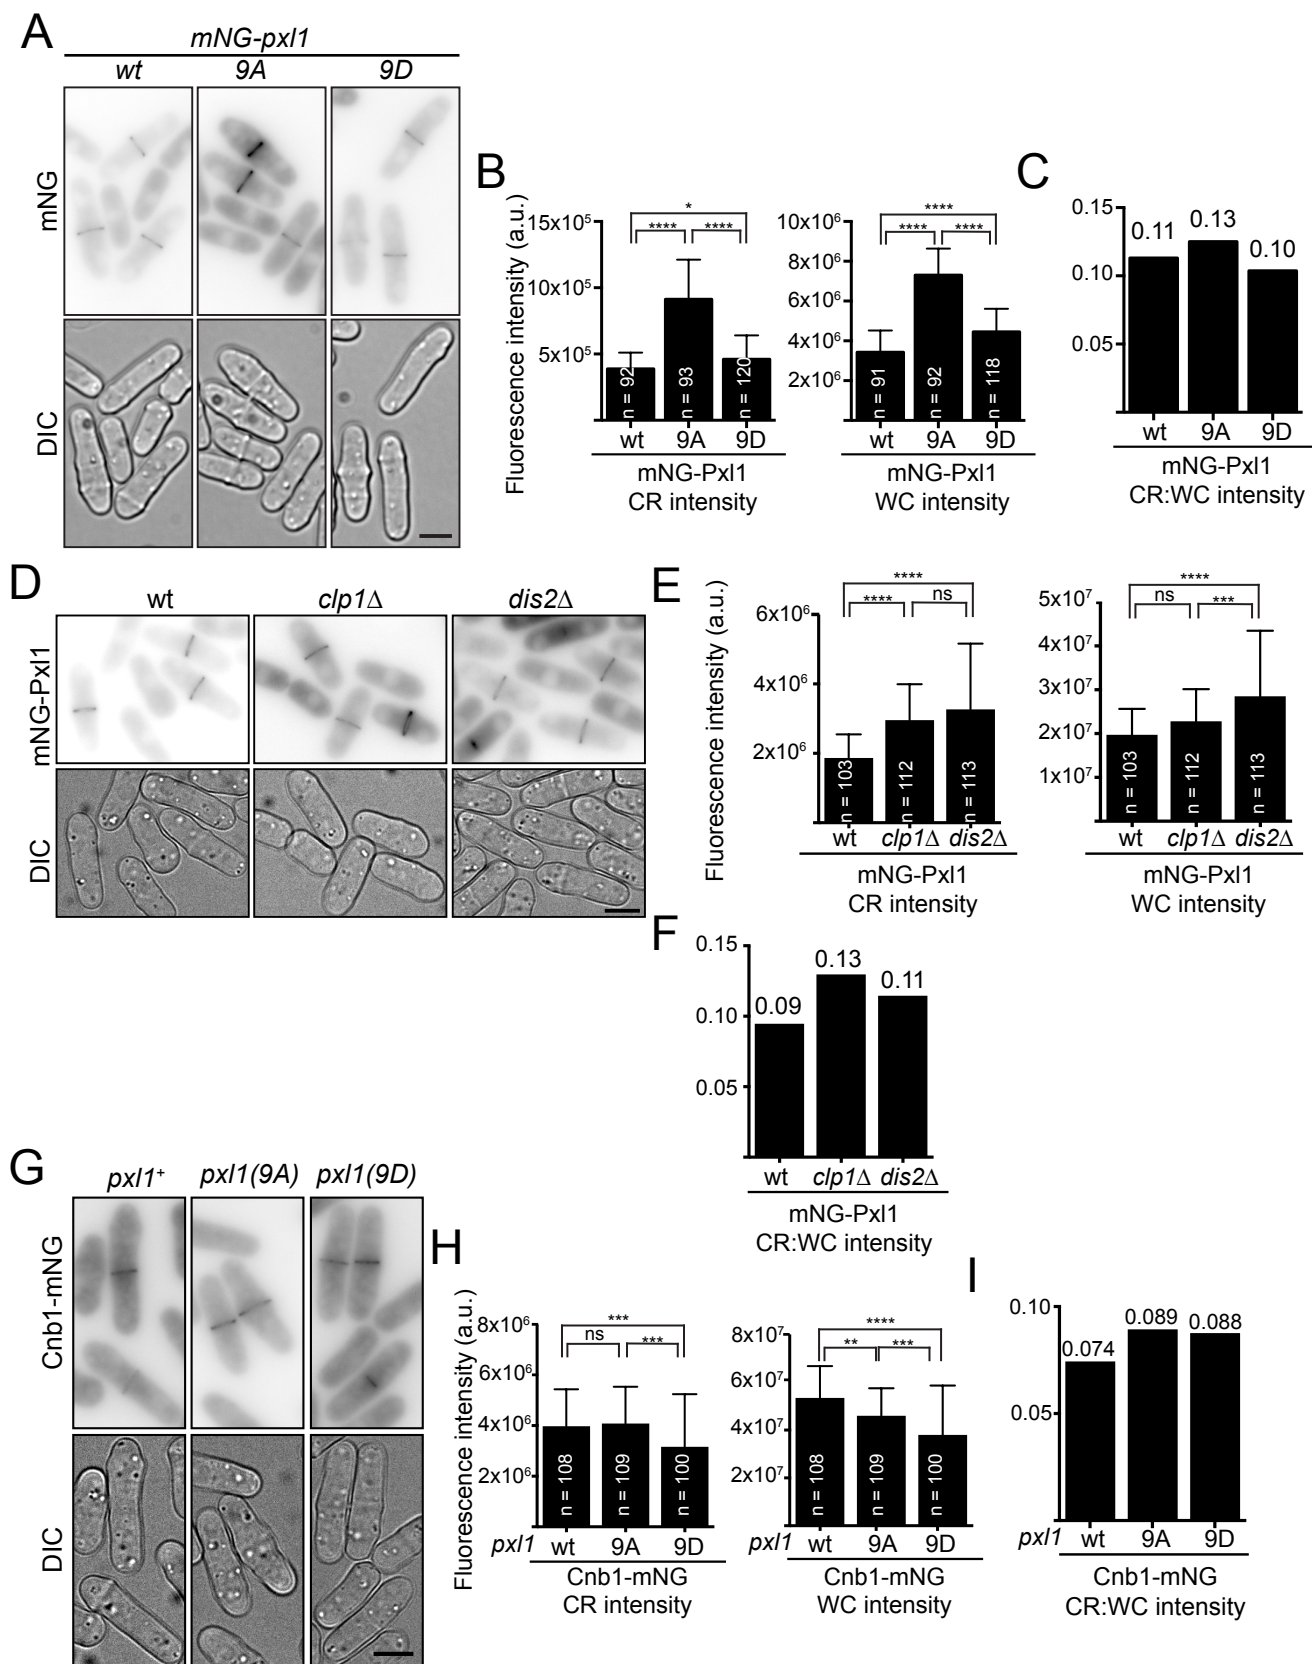

Figure S3

**Table S1. *S. pombe* strains used in this study**

| Strain number    | Genotype                                                                                                                   | Source     |
|------------------|----------------------------------------------------------------------------------------------------------------------------|------------|
| <b>Figure 1</b>  |                                                                                                                            |            |
| KGY246           | <i>ade6-M210 ura4-D18 leu1-32 h<sup>-</sup></i>                                                                            | Lab stock  |
| KGY11532-2       | <i>cdc25-22 pxl1::kan<sup>R</sup> leu1:HA-pxl1 ura4-D18 h<sup>+</sup> (ade?)</i>                                           | This study |
| <b>Figure 2</b>  |                                                                                                                            |            |
| KGY246           | <i>ade6-M210 ura4-D18 leu1-32 h<sup>-</sup></i>                                                                            | Lab stock  |
| KGY18026-2       | <i>HA<sub>3</sub>-pxl1:kan<sup>R</sup> ade6-M21X leu1-32 ura4-D18 h<sup>-</sup></i>                                        | This study |
| KGY18031-2       | <i>HA<sub>3</sub>-pxl1(9A):kan<sup>R</sup> ade6-M21X leu1-32 ura4-D18 h<sup>-</sup></i>                                    | This study |
| KGY18043-2       | <i>HA<sub>3</sub>-pxl1(9D):kan<sup>R</sup> ade6-M21X leu1-32 ura4-D18 h<sup>-</sup></i>                                    | This study |
| KGY19171-2       | <i>cdc25-22 HA<sub>3</sub>-pxl1:kan<sup>R</sup> ade6-M21X leu1-32 ura4-D18</i>                                             | This study |
| KGY19188-2       | <i>cdc25-22 HA<sub>3</sub>-pxl1(9A):kan<sup>R</sup> ade6-M21X leu1-32 ura4-D18</i>                                         | This study |
| KGY19289-2       | <i>cdc25-22 HA<sub>3</sub>-pxl1(9D):kan<sup>R</sup> ade6-M21X leu1-32 ura4-D18</i>                                         | This study |
| <b>Figure 3</b>  |                                                                                                                            |            |
| KGY246           | <i>ade6-M210 ura4-D18 leu1-32 h<sup>-</sup></i>                                                                            | Lab stock  |
| KGY11532-2       | <i>cdc25-22 pxl1::kan<sup>R</sup> leu1:HA-pxl1 ura4-D18 h<sup>+</sup> (ade?)</i>                                           | This study |
| KGY18026-2       | <i>HA<sub>3</sub>-pxl1:kan<sup>R</sup> ade6-M21X leu1-32 ura4-D18 h<sup>-</sup></i>                                        | This study |
| KGY19091-2       | <i>clp1::ura4<sup>+</sup> HA<sub>3</sub>-pxl1:kan<sup>R</sup> ade6-M21X leu1-32 ura4-D18</i>                               | This study |
| KGY19599         | <i>dis2::ura4<sup>+</sup> HA<sub>3</sub>-pxl1:kan<sup>R</sup> ade6-M21X leu1-32 ura4-D18</i>                               | This study |
| <b>Figure 4</b>  |                                                                                                                            |            |
| KGY11852-2       | <i>mNG-pxl1:kan<sup>R</sup> sid4-mNG:hyg<sup>R</sup> ade6-M210 ura4-D18 leu1-32 h<sup>+</sup></i>                          | This study |
| KGY18618-2       | <i>mNG-pxl1(9A):kan<sup>R</sup> sid4-mNG:hyg<sup>R</sup> ade6-M210 ura4-D18 leu1-32 h<sup>-</sup></i>                      | This study |
| KGY18627-2       | <i>mNG-pxl1(9D):kan<sup>R</sup> sid4-mNG:hyg<sup>R</sup> ade6-M210 ura4-D18 leu1-32 h<sup>-</sup></i>                      | This study |
| KGY19083         | <i>rlc1-mNG:hyg<sup>R</sup> sid4-mNG:kan<sup>R</sup> ade6-M21X ura4-D18 leu1-32 h<sup>+</sup></i>                          | Lab stock  |
| KGY18681-2       | <i>pxl1(9A):kan<sup>R</sup> rlc1-mNG:hyg<sup>R</sup> sid4-mNG:kan<sup>R</sup> ade6-M21X ura4-D18 leu1-32 h<sup>-</sup></i> | This study |
| KGY19089-2       | <i>pxl1(9D):kan<sup>R</sup> rlc1-mNG:hyg<sup>R</sup> sid4-mNG:kan<sup>R</sup> ade6-M21X ura4-D18 leu1-32 h<sup>-</sup></i> | This study |
| <b>Figure S1</b> |                                                                                                                            |            |
| KGY5663          | <i>nda3-KM311 ade6-M10X leu1-32 ura4-D18 h<sup>+</sup></i>                                                                 | Lab stock  |
| KGY18174         | <i>pxl1::kan<sup>R</sup> GFP-pxl1:leu1<sup>+</sup> nda3-KM311 ade6-M10X leu1-32 ura4-D18</i>                               | This study |
| <b>Figure S2</b> |                                                                                                                            |            |
| KGY246           | <i>ade6-M210 ura4-D18 leu1-32 h<sup>-</sup></i>                                                                            | Lab stock  |
| KGY18026-2       | <i>HA<sub>3</sub>-pxl1:kan<sup>R</sup> ade6-M21X leu1-32 ura4-D18 h<sup>-</sup></i>                                        | This study |
| KGY19091-2       | <i>clp1::ura4<sup>+</sup> HA<sub>3</sub>-pxl1:kan<sup>R</sup> ade6-M21X leu1-32 ura4-D18</i>                               | This study |
| KGY19599         | <i>dis2::ura4<sup>+</sup> HA<sub>3</sub>-pxl1:kan<sup>R</sup> ade6-M21X leu1-32 ura4-D18</i>                               | This study |
| KGY4129-2        | <i>clp1::ura4<sup>+</sup> dis2::ura4<sup>+</sup> HA<sub>3</sub>-pxl1:kan<sup>R</sup> ade6-M21X leu1-32 ura4-D18</i>        | This study |
| <b>Figure S3</b> |                                                                                                                            |            |
| KGY3981-2        | <i>mNG-pxl1:kan<sup>R</sup> ade6-M210 ura4-D18 leu1-32 h<sup>-</sup></i>                                                   | This study |
| KGY18534         | <i>mNG-pxl1(9A):kan<sup>R</sup> ade6-M210 ura4-D18 leu1-32 h<sup>-</sup></i>                                               | This study |

|           |                                                                                                 |                     |
|-----------|-------------------------------------------------------------------------------------------------|---------------------|
| KGY18607  | <i>mNG-pxl1(9D):kan<sup>R</sup> ade6-M210 ura4-D18 leu1-32 h<sup>-</sup></i>                    | This study          |
| KGY4123-2 | <i>mNG-pxl1:kan<sup>R</sup> clp1::ura4<sup>+</sup> ade6-M210 ura4-D18 leu1-32 h<sup>+</sup></i> | This study          |
| KGY4130-2 | <i>mNG-pxl1:kan<sup>R</sup> dis2::ura4<sup>+</sup> ade6-M210 ura4-D18 leu1-32</i>               | This study          |
| KGY1480-2 | <i>cnb1-mNG:hyg<sup>R</sup> ade6-M210 ura4-D18 leu1-32 h-</i>                                   | Snider et al., 2020 |
| KGY4104-2 | <i>cnb1-mNG:hyg<sup>R</sup> pxl1(9D):kan<sup>R</sup> ade6-M210 ura4-D18 leu1-32</i>             | This study          |
| KGY4125-2 | <i>cnb1-mNG:hyg<sup>R</sup> pxl1(9A):kan<sup>R</sup> ade6-M210 ura4-D18 leu1-32</i>             | This study          |

## Supplemental Figure Legends

**Figure S1. Related to Figure 2. In vivo evidence of Pxl1 phosphorylated sites.** A) All [S/T]P sites in Pxl1 N-terminus and evidence of in vivo phosphorylation from MS analysis from this study or others. References are: 1- (Carpy et al., 2014), 2- (Kettenbach et al., 2015), 3- (Koch et al., 2011), 4- (Swaffer et al., 2016), 5- (Swaffer et al., 2018). B) Mass spectra of a representative phosphopeptide from each of the identified Cdk1 phosphorylation sites on Pxl. These mass spectra were extracted from Scaffold PTM with matched b and y ions highlighted in red and blue, respectively. Ions resulting from neutral loss are highlighted in green. For most of the phosphorylation sites, both MS/MS (MS2) and MS/MS/MS (MS3, i.e. further MS/MS fragmentation of the ion which results from the neutral loss of phosphate of the parent ion during MS2 scan) spectra were acquired. In these cases, only MS2 spectra are shown here. Sp/Tp: phosphorylated serine/threonine.

**Figure S2. Related to Figures 2 and 3. The Pxl1 N-terminus is phosphorylated by Cdk1 on Thr and Ser.** A) Phosphoamino acid analysis and B) tryptic phosphopeptide mapping of Pxl1 full-length (FL) and N-terminal (N) fragments phosphorylated by Cdk1. C) IP samples separated by SDS-PAGE and IB for indicated proteins.

**Figure S3. Related to Figure 4. Consequences of Pxl1 phosphorylation.** A, D, G) Sum projections (mNG) or DIC representative images. Scale bar is 5  $\mu$ m. B, E, H) Average CR and whole cell (WC) intensity of the indicated proteins. Error bars are SD. \*\*\*\*  $p < 0.0001$ , \*\*\*  $p < 0.001$ , \*\*  $p < 0.01$ , \*  $p < 0.05$ , One-way ANOVA with Tukey's post hoc test for multiple comparisons. C, G, I) Ratio of average CR and WC intensities from the data collected B, E, H respectively.

## Supplemental references

Carpy, A., Krug, K., Graf, S., Koch, A., Popic, S., Hauf, S., and Macek, B. (2014). Absolute proteome and phosphoproteome dynamics during the cell cycle of *Schizosaccharomyces pombe* (Fission Yeast). *Mol Cell Proteomics* 13, 1925-1936.

Kettenbach, A.N., Deng, L., Wu, Y., Baldissard, S., Adamo, M.E., Gerber, S.A., and Moseley, J.B. (2015). Quantitative phosphoproteomics reveals pathways for coordination of cell growth and division by the conserved fission yeast kinase pom1. *Mol Cell Proteomics* 14, 1275-1287.

Koch, A., Krug, K., Pengelley, S., Macek, B., and Hauf, S. (2011). Mitotic substrates of the kinase aurora with roles in chromatin regulation identified through quantitative phosphoproteomics of fission yeast. *Sci Signal* 4, rs6.

Swaffer, M.P., Jones, A.W., Flynn, H.R., Snijders, A.P., and Nurse, P. (2016). CDK Substrate Phosphorylation and Ordering the Cell Cycle. *Cell* 167, 1750-1761.e1716.

Swaffer, M.P., Jones, A.W., Flynn, H.R., Snijders, A.P., and Nurse, P. (2018). Quantitative Phosphoproteomics Reveals the Signaling Dynamics of Cell-Cycle Kinases in the Fission Yeast *Schizosaccharomyces pombe*. *Cell Rep* 24, 503-514.
